# Supplementary material for: A Probabilistic Boolean Network Approach for the Analysis of Cancer-Specific Signalling: A Case Study of Deregulated PDGF Signalling in GIST
Source: PubMed Central journal article supplement (PMC4883749; doi:10.1371/journal.pone.0156223), 2016-05-27
Supplement: pone.0156223.s001.pdf [file pone.0156223.s001.pdf]

# PDGFR $\alpha$ D842V

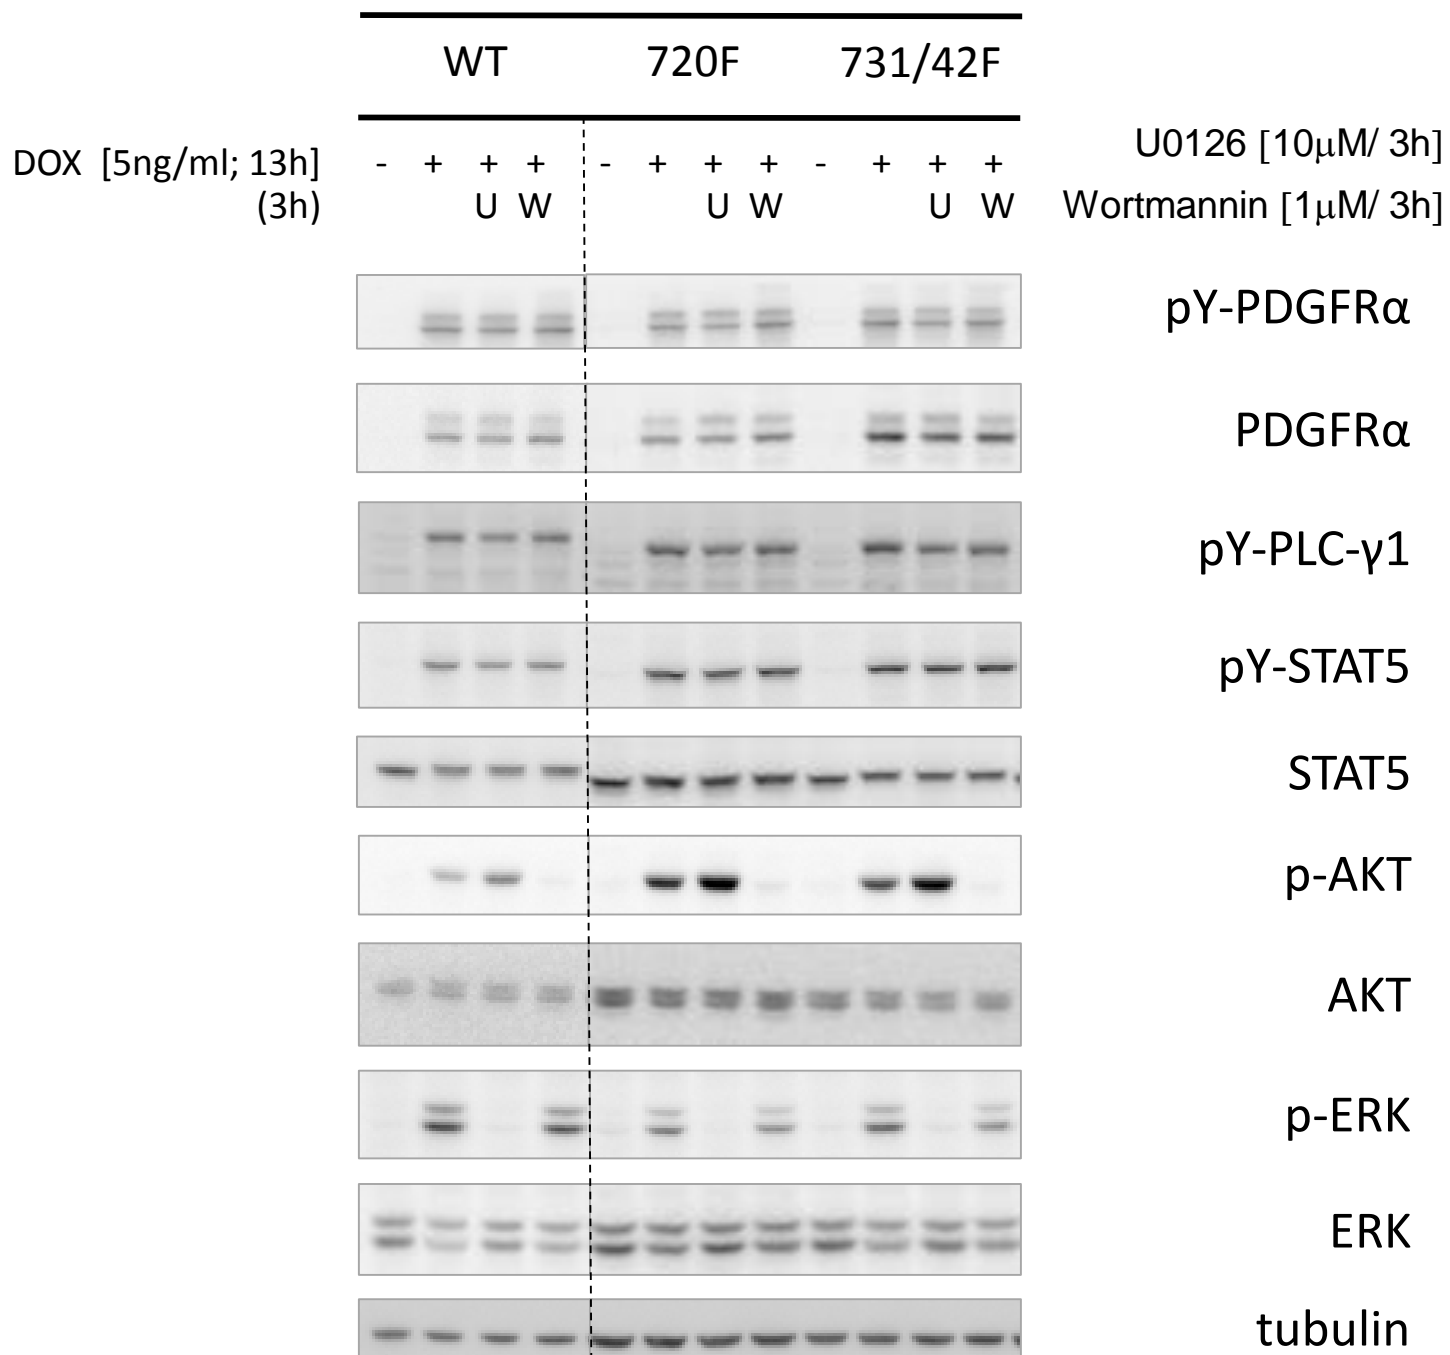

The represented blots were cut for representation purpose (dashed line)
