# Supplementary material for: A Probabilistic Boolean Network Approach for the Analysis of Cancer-Specific Signalling: A Case Study of Deregulated PDGF Signalling in GIST
Source: PubMed Central journal article supplement (PMC4883749; doi:10.1371/journal.pone.0156223), 2016-05-27
Supplement: pone.0156223.s002.pdf [file pone.0156223.s002.pdf]

## All-or-none inhibition (no crosstalk) / Fitting cost: 0.802

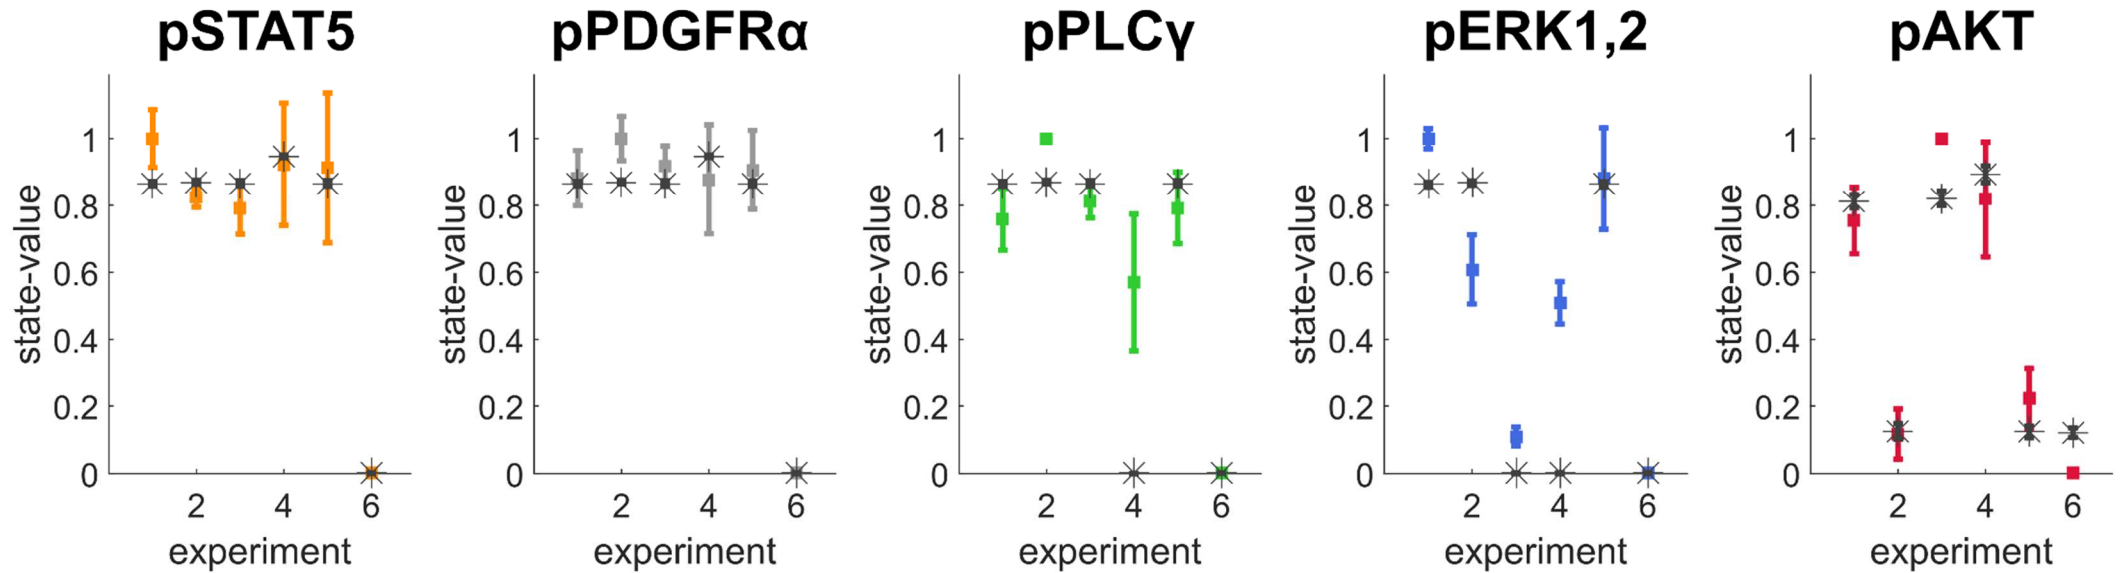

## Partial inhibition (no crosstalk) / Fitting cost: 0.198

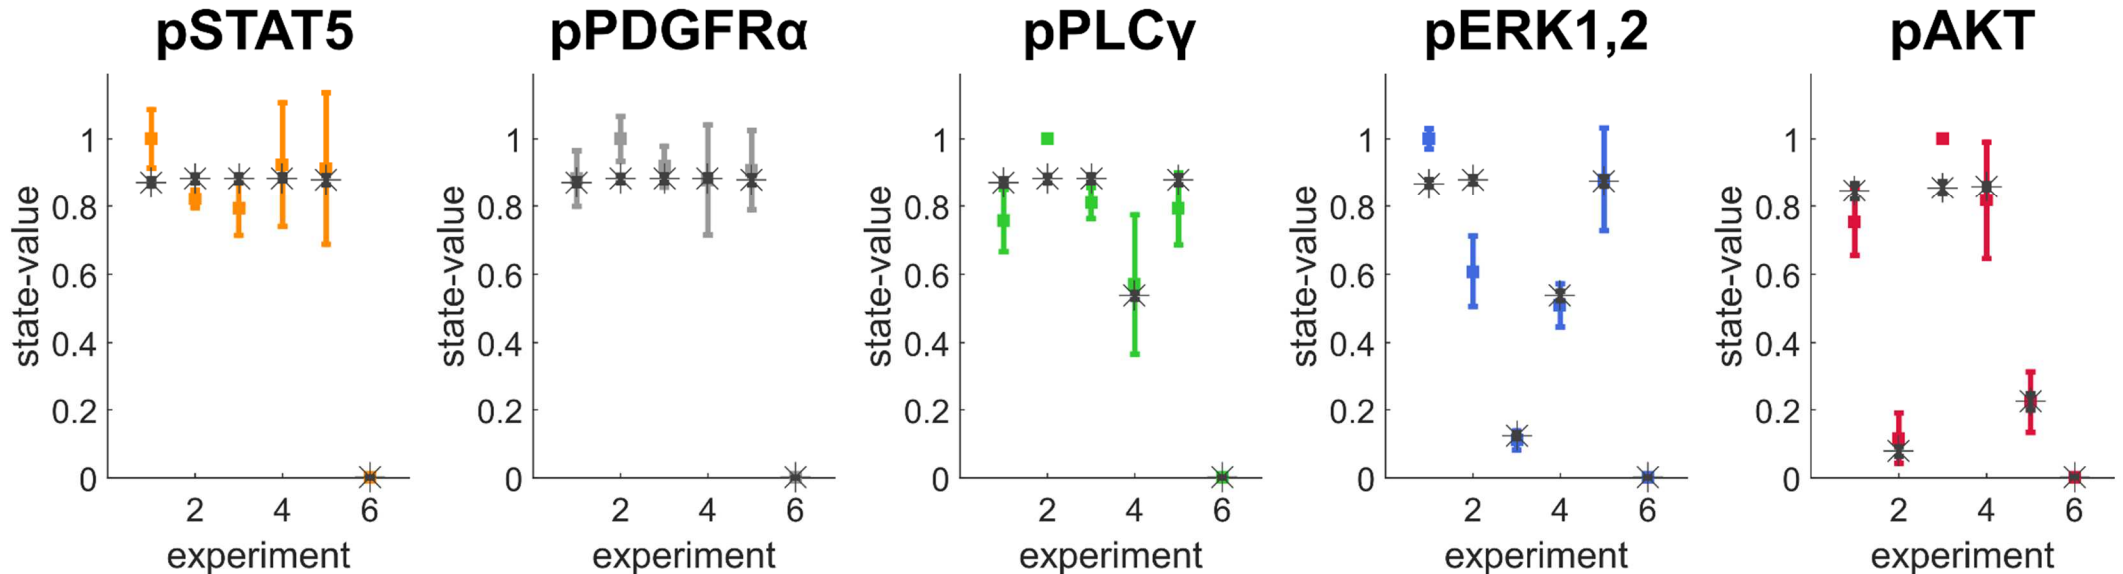

Annotation on x-axis: 1 = DV-WT, 2 = DV-WT-Wort., 3 = DV-WT-U0126, 4 = DV-dMAPK, 5 = DV-dPI3K, 6 = neg ct.
