# Supplementary material for: A Probabilistic Boolean Network Approach for the Analysis of Cancer-Specific Signalling: A Case Study of Deregulated PDGF Signalling in GIST
Source: PubMed Central journal article supplement (PMC4883749; doi:10.1371/journal.pone.0156223), 2016-05-27
Supplement: pone.0156223.s003.pdf [file pone.0156223.s003.pdf]

## Model variant without crosstalk interaction

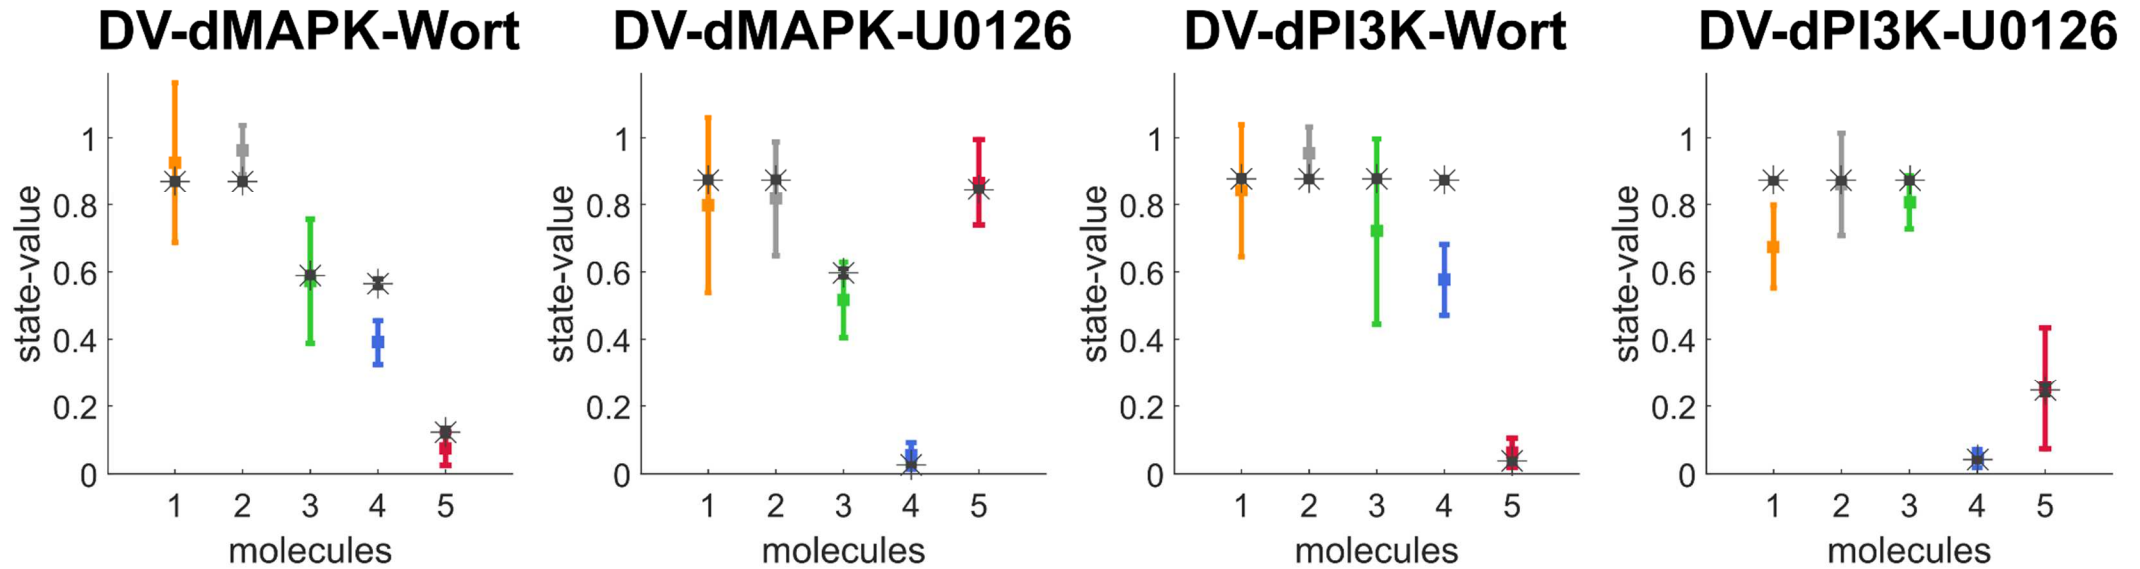

## Final model (with PI3K->MEK1,2 interaction)

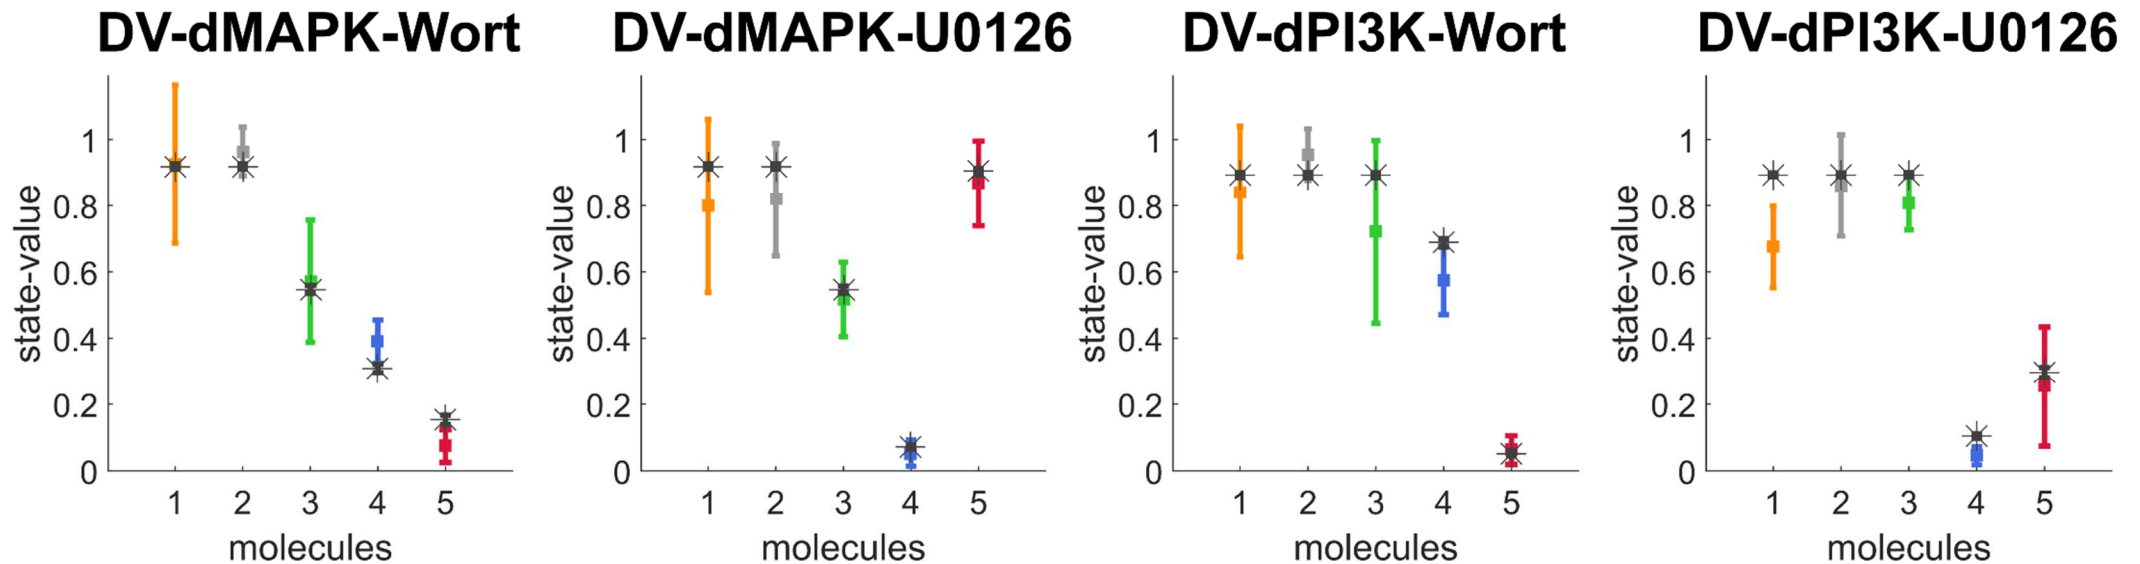

Annotation on x-axis: 1 = pSTAT5, 2 = pPDGFR $\alpha$ , 3 = pPLC $\gamma$ , 4 = pERK1,2, 5 = pAKT
