# Supplementary material for: A Probabilistic Boolean Network Approach for the Analysis of Cancer-Specific Signalling: A Case Study of Deregulated PDGF Signalling in GIST
Source: PubMed Central journal article supplement (PMC4883749; doi:10.1371/journal.pone.0156223), 2016-05-27
Supplement: pone.0156223.s004.pdf [file pone.0156223.s004.pdf]

# Effect of single perturbation experiment removal on model prediction

All single  
perturbation

No Exp2  
(No Wort)

No Exp3  
(No U0126)

No Exp4  
(No dMAPK)

No Exp7  
(No dPI3K)

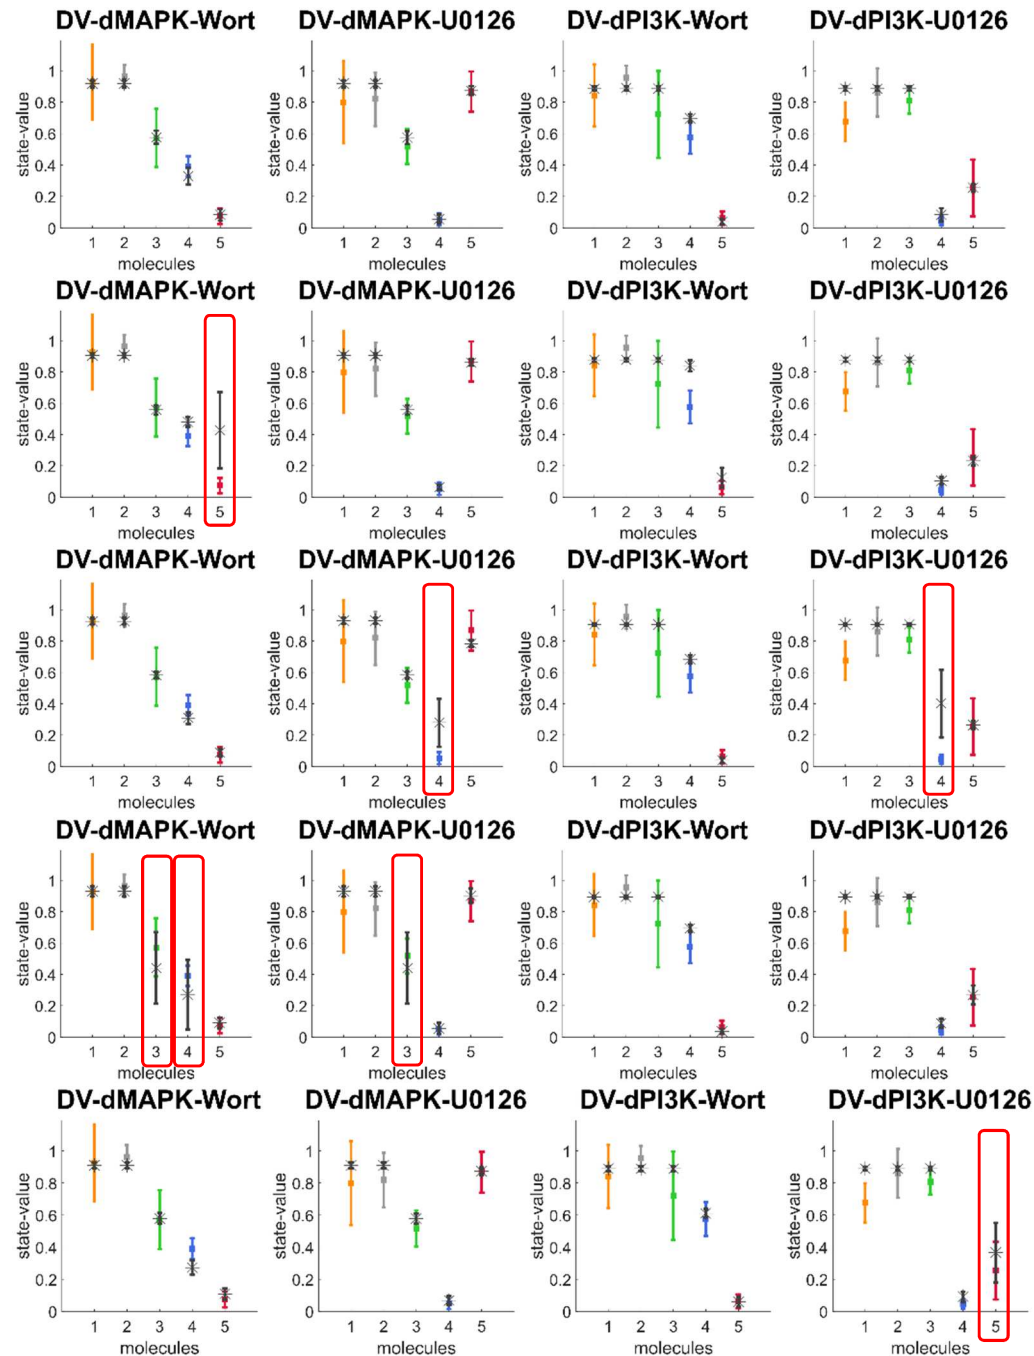

Annotation on x-axis: 1 = pSTAT5, 2 = pPDGFR $\alpha$ , 3 = pPLC $\gamma$ , 4 = pERK1,2, 5 = pAKT
