# Supplementary material for: A Probabilistic Boolean Network Approach for the Analysis of Cancer-Specific Signalling: A Case Study of Deregulated PDGF Signalling in GIST
Source: PubMed Central journal article supplement (PMC4883749; doi:10.1371/journal.pone.0156223), 2016-05-27
Supplement: pone.0156223.s010.pdf [file pone.0156223.s010.pdf]

## Supporting Information S6 File:

### Comparison of PBN versus Boolean network and ODE-based modelling results

---

We compared model complexity and optimisation results of the deregulated PDGF signalling in G1S1T in the PBN framework to the ones generated by Boolean networks and ODE-based models, see Table 1. The plotted output states of selected molecules are demonstrated in Fig 1.

**Table 1.** Comparison of model complexities and optimisation results from 3 different modelling approaches.

|                                | BN (BN/PBN) | PBN (optPBN) | ODE (SBTB2) |
|--------------------------------|-------------|--------------|-------------|
| Number of nodes                | 23          | 27           | 24          |
| Number of rules/reactions      | 23          | 41 to 42     | 45          |
| Number of optimised parameters | None        | 25 to 27     | 51 to 53    |
| Best optimal cost (no CT)      | 1.206       | 0.208        | 0.324       |
| AIC value (no CT)              | N/A         | -117.20      | -50.56      |
| Best optimal cost (with CT4)   | 1.188       | 0.162        | 0.253       |
| AIC value (with CT4)           | N/A         | -121.45      | -54.77      |

The model complexities (sizes, interactions, and optimised parameters) as well as the fitting costs and the AIC values of two different model variants, i.e. a revised model without crosstalk (no CT) and the final model with the essential crosstalk number 4 (CT4) from PI3K to MEK1,2, generated by 3 modelling approaches are compared. The computational tools used for the analysis are shown in parentheses next to the names of modelling frameworks. The ranges of rules/reactions and of optimised parameters, if exist, indicate the numbers for the model variant without crosstalk and with the essential crosstalk number 4, respectively.

It was shown that Boolean modelling yields the smallest network as only one Boolean rule is assigned for each node. Because of its simplicity, different types of interactions are combined and influence the target node in an all-or-none fashion, resulting in state values of 0 or 1. Such discrete state values do not fit well to the normalised experimental data in our setting and lead to a high fitting cost. Even if the experimental data were discretised to 0 or 1 using the cut-off of 0.5 prior to the comparison, the model in the Boolean network framework still could not correctly describe the partial signal abrogation of pPLC $\gamma$  in the DV-dMAPK mutant and return a high optimal cost (data not shown).

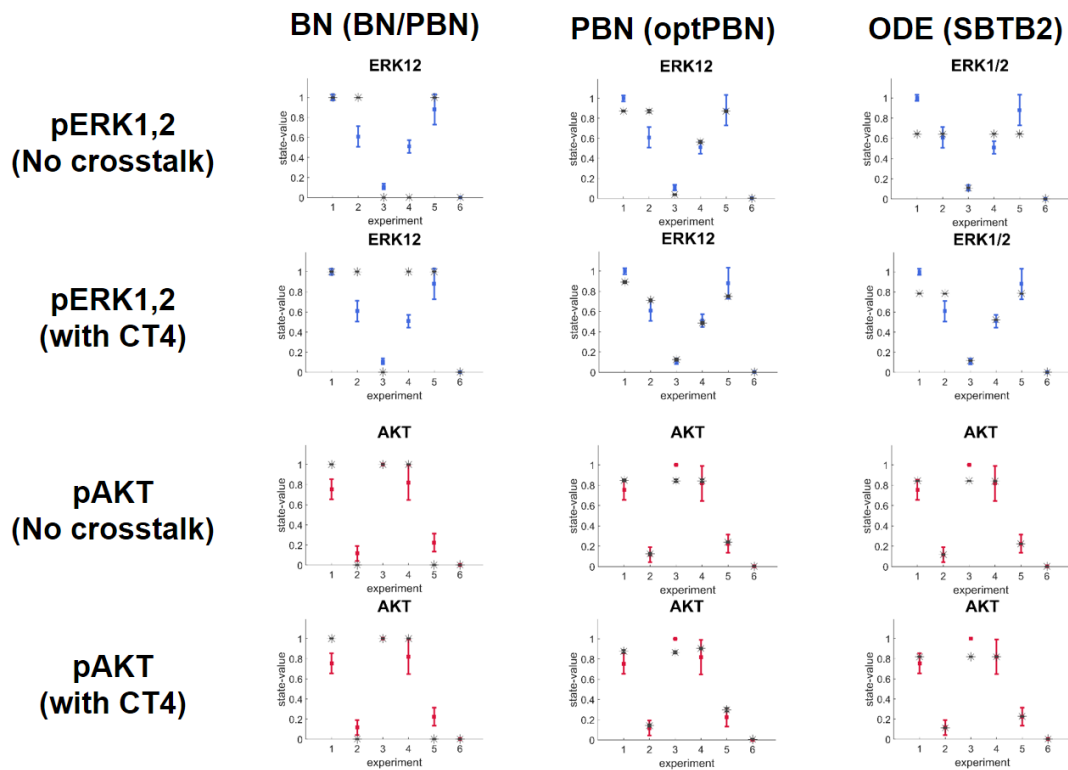

Annotation on x-axis: 1 = DV-WT, 2 = DV-WT-Wort., 3 = DV-WT-U0126, 4 = DV-dMAPK, 5 = DV-dPI3K, 6 = neg ct.

Fig 1. Comparative model fitting among the 3 modelling frameworks

Simulated state values of pERK1,2 and pAKT molecules in two model variants, i.e. the revised model without crosstalk and the final model with essential crosstalk number 4 from PI3K to MEK1,2, generated from the optimised models in 3 different modelling frameworks, i.e. Boolean network (BN), probabilistic Boolean network (PBN) and ordinary differential equation-based model (ODE), are shown.

On the other hand, modelling the same network topology using a detailed mechanistic modelling framework such as ODE-based modelling results in a more complex model structure. One of the contributing factors that increase the complexity is the addition of deactivation/degradation interactions and their corresponding rates for each molecule to balance the activation/synthesis. This assignment is not required in the BN or PBN frameworks. In addition, there are also higher numbers of parameter to be optimised in the ODE-based model.

A comparison of the results of the different modelling approaches (see Table 1) shows that PBN is the most concise modelling approach that still allows to nicely fit the experimental data in our setting with a low number of parameters as also reflected in the respective AIC values. Furthermore, we analysed the distribution of the optimised parameters from 20 optimisation rounds and found that the coefficients of variation of the parameters in the PBN model is less than half of the ones in the ODE-based model (see Tables 2 and 3), pointing to a better identifiability.

**Table 2.** The distributions of optimised parameters in PBN model.

| Rules                      | Mean  | S.D.  | C.V.         |
|----------------------------|-------|-------|--------------|
| SHP2 = PDGFR               | 0.442 | 0.065 | 0.147        |
| SHP2 = 0 (dMAPK)           | 0.558 | 0.065 | 0.116        |
| MEK12 = MEK12_induce       | 0.109 | 0.057 | 0.522        |
| MEK12 = 0 (U0126)          | 0.891 | 0.057 | 0.064        |
| PI3K_PDGFR = PDGFR         | 0.284 | 0.049 | 0.172        |
| PI3K_PDGFR = 0 (dPI3K)     | 0.716 | 0.049 | 0.068        |
| PI3K = prePI3K             | 0.065 | 0.055 | 0.844        |
| PI3K = 0 (Wortmannin)      | 0.935 | 0.055 | 0.059        |
| PLCg = PDGFR               | 0.628 | 0.048 | 0.077        |
| PLCg = 0 (dMAPK)           | 0.372 | 0.048 | 0.129        |
| PKC = PKC_induce           | 0.875 | 0.055 | 0.063        |
| PKC = 0 (Wortmannin)       | 0.125 | 0.055 | 0.439        |
| PDGFR = DOX                | 0.655 | 0.129 | 0.197        |
| PDGFR = DOX & ~cCbl        | 0.046 | 0.035 | 0.764        |
| PDGFR = DOX & ~PPX         | 0.251 | 0.148 | 0.591        |
| PDGFR = DOX & ~SHP2        | 0.048 | 0.034 | 0.708        |
| MEK12_induce = Raf1        | 0.783 | 0.037 | 0.047        |
| MEK12_induce = PI3K        | 0.217 | 0.037 | 0.170        |
| PIP3 = PI3K                | 0.958 | 0.037 | 0.039        |
| PIP3 = PI3K & ~bPTEN       | 0.042 | 0.037 | 0.874        |
| PDK = PIP3                 | 0.863 | 0.156 | 0.181        |
| PDK = bPDK                 | 0.137 | 0.156 | 1.138        |
| AKT = PIP3                 | 0.446 | 0.256 | 0.573        |
| AKT = PDK                  | 0.134 | 0.092 | 0.685        |
| AKT = MTOR                 | 0.420 | 0.258 | 0.614        |
| PKC_induce = IP3_Calon_DAG | 0.017 | 0.020 | 1.195        |
| PKC_induce = bPKC          | 0.983 | 0.020 | 0.020        |
| <b>Mean</b>                |       |       | <b>0.389</b> |
| <b>Max</b>                 |       |       | <b>1.195</b> |

The distributions of optimised parameter values in the PBN model from 20 optimisation runs are shown.

**Table 3.** Compared distributions of optimised parameters in PBN versus ODE-based models.

| Parameters  | Mean   | S.D.   | C.V.         |
|-------------|--------|--------|--------------|
| k1          | 43.482 | 38.289 | 0.881        |
| k2          | 62.307 | 28.889 | 0.464        |
| k322        | 60.359 | 36.179 | 0.599        |
| k32         | 59.426 | 37.089 | 0.624        |
| k332        | 56.388 | 33.311 | 0.591        |
| k33         | 49.547 | 36.677 | 0.740        |
| k34         | 32.001 | 37.387 | 1.168        |
| k35         | 38.040 | 38.576 | 1.014        |
| k36         | 41.857 | 33.549 | 0.802        |
| k3          | 45.452 | 38.651 | 0.850        |
| k422        | 42.145 | 41.475 | 0.984        |
| k42         | 50.923 | 38.556 | 0.757        |
| k432        | 23.979 | 34.951 | 1.458        |
| k43         | 64.362 | 34.088 | 0.530        |
| k442        | 8.018  | 18.157 | 2.264        |
| k443        | 15.123 | 23.652 | 1.564        |
| k444        | 35.469 | 41.866 | 1.180        |
| k44         | 24.888 | 34.017 | 1.367        |
| k4          | 34.011 | 37.363 | 1.099        |
| k52         | 40.836 | 45.777 | 1.121        |
| k532        | 51.611 | 36.170 | 0.701        |
| k53         | 55.524 | 43.146 | 0.777        |
| k5          | 40.195 | 27.679 | 0.689        |
| kU0126      | 29.267 | 35.028 | 1.197        |
| kU01262     | 18.576 | 34.757 | 1.871        |
| kWort1      | 31.265 | 38.271 | 1.224        |
| kWort2      | 44.524 | 41.426 | 0.930        |
| kcross4     | 57.410 | 40.586 | 0.707        |
| kdMAPK1     | 27.236 | 38.040 | 1.397        |
| kdMAPK2     | 0.292  | 0.015  | 0.053        |
| kdPI3K      | 45.648 | 42.130 | 0.923        |
| koff1       | 47.415 | 40.630 | 0.857        |
| koff2       | 21.251 | 36.930 | 1.738        |
| koff3       | 25.331 | 34.526 | 1.363        |
| koffppx     | 52.721 | 37.922 | 0.719        |
| kon         | 48.624 | 28.877 | 0.594        |
| kp1         | 43.146 | 36.352 | 0.843        |
| kp2         | 7.466  | 5.160  | 0.691        |
| kp322       | 57.356 | 38.308 | 0.668        |
| kp32        | 36.276 | 37.604 | 1.037        |
| kp33        | 34.415 | 35.994 | 1.046        |
| kp34        | 36.856 | 38.707 | 1.050        |
| kp35        | 10.310 | 21.131 | 2.050        |
| kp36        | 26.593 | 23.111 | 0.869        |
| kp3         | 41.709 | 35.960 | 0.862        |
| kp42        | 15.970 | 19.069 | 1.194        |
| kp43        | 39.348 | 40.047 | 1.018        |
| kp442       | 43.193 | 35.014 | 0.811        |
| kp44        | 34.093 | 25.767 | 0.756        |
| kp4         | 37.254 | 44.578 | 1.197        |
| kp52        | 45.600 | 39.275 | 0.861        |
| kp53        | 1.980  | 2.271  | 1.147        |
| kp5         | 7.986  | 5.398  | 0.676        |
| <b>Mean</b> |        |        | <b>0.992</b> |
| <b>Max</b>  |        |        | <b>2.264</b> |

The distributions of optimised parameter values in the ODE model from 20 optimisation runs are shown.

We also compared the quality of the model predictions of the combinatorial perturbation experiments. The respective predictions for dMAPK with Wortmannin and dPI3K with Wortmannin are shown in Fig 2.

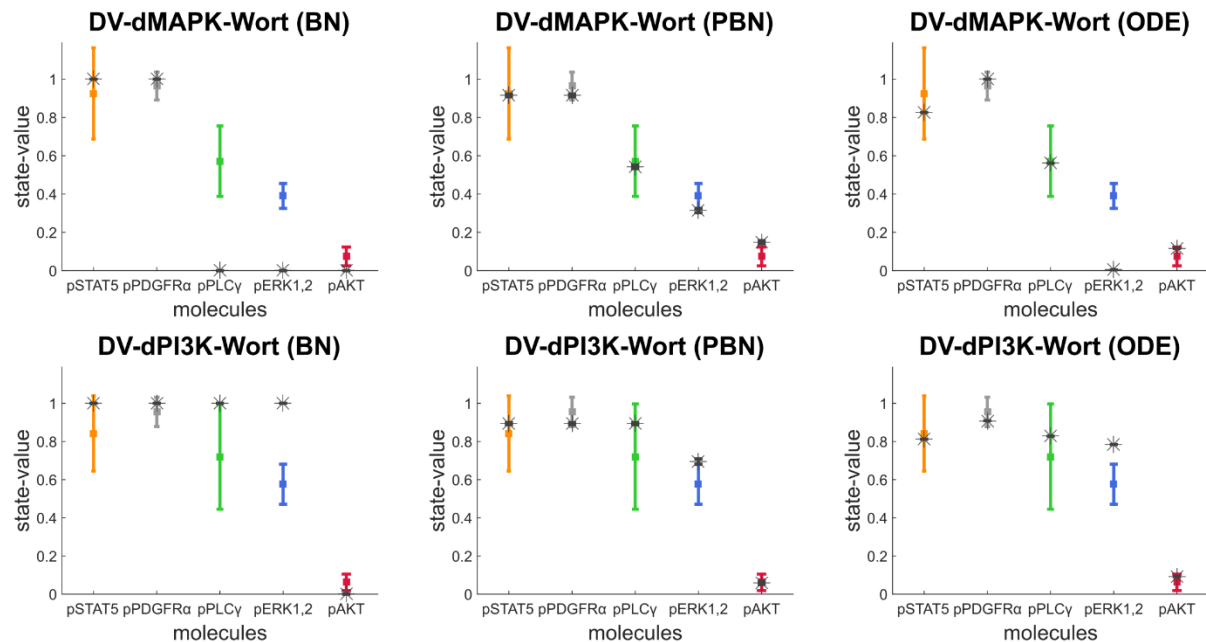

**Fig 2.** Comparison of model predictions from 3 different modelling approaches.

Model predictions on the signalling profiles of two combined perturbation experiments, i.e. dMAPK with Wortmannin (upper row) and dPI3K with Wortmannin (lower row), generated from 3 different modelling approaches, i.e. Boolean networks (BN), probabilistic Boolean network (PBN), and ODE-based model, are shown. Mean and standard deviation of ten simulated values from the 3 models (black stars [means] and error bars [SD] on top) were compared against the experimental data (multi-coloured squares [mean] and error bars [SD] on bottom). Five molecules as labelled on the x-axis are in the following order: pSTAT5, pPDGFR $\alpha$ , pPLC $\gamma$ , pERK1,2 and pAKT.

Similar to the quality of model fitting, the quality of model predictions from the Boolean network approach is poor due to inherent qualitative nature of this framework. Even if a discretisation step is applied prior to the comparison, the discretised experimental data of pPLC $\gamma$  in the DV-dMAPK-Wortmannin condition (1) still does not match the predicted Boolean logic value (0). On the other side, we found that the quality of model predictions from the ODE-based model is generally high, only slightly below the quality of the PBN model predictions.
