# Supplementary material for: A Probabilistic Boolean Network Approach for the Analysis of Cancer-Specific Signalling: A Case Study of Deregulated PDGF Signalling in GIST
Source: PLoS One. 2016 May 27;11(5):e0156223. doi: 10.1371/journal.pone.0156223 (PMC4883749; doi:10.1371/journal.pone.0156223)
Supplement: S3 File — This spreadsheet provides the number of data points and the number of optimised parameters for each model variant. In addition, the fitting costs from 3 optimisation runs of each model variants are provided where only small variations between runs were observed. The calculated AIC values and F values from F-test for regression model are also shown. (XLSX) [file pone.0156223.s007.xlsx]

## Sheet: Summarised Results
Model complexities and the fitting cost of model variants from 3 optimisation runs
Step1 : Model training
Crosstalk Number	Descriptions	Number of data points	Number of optimised parameters	Run	Fitting Cost	Mean fitting cost	AIC value (Best run)	F-value*
-	No crosstalk	30	23	1	0.198	0.199	-104.621	(based model)
				2	0.2
				3	0.2
1	Ras -> PI3K	30	25	1	0.2	0.201	-101.388	-0.0298507
				2	0.21
				3	0.193
2	MEK1,2 -| Grb2SOS	30	25	1	0.197	0.197	-100.772	0.0304569
				2	0.197
				3	0.198
3	PI3K -> Ras	30	25	1	0.155	0.157	-107.966	0.802548
				2	0.162
				3	0.155
4	PI3K -> MEK1,2	30	25	1	0.147	0.153	-109.556	0.901961
				2	0.158
				3	0.155
5	PIP3 -> GabSOS	30	25	1	0.198	0.196	-101.7	0.0459184
				2	0.198
				3	0.191
6	Akt -| GabSOS	30	25	1	0.197	0.196	-101.858	0.0459184
				2	0.201
				3	0.19
7	Akt -| Raf	30	25	1	0.194	0.201	-101.233	-0.0298507
				2	0.199
				3	0.21
8	PLCγ -> PI3K	30	25	1	0.197	0.197	-100.772	0.0304569
				2	0.198
				3	0.197
9	PKC -> MEK1,2	30	25	1	0.13	0.13	-113.243	1.59231
				2	0.131
				3	0.131
				*The critical value of the F-distribution for a desired false-rejection probability (alpha) at 0.05 is 5.143
Step2 : Model refinement
Crosstalk Number	Descriptions	Number of data points	Number of optimised parameters	Run	Fitting Cost	Mean fitting cost	AIC value (Best run)	F-test**
-	No crosstalk	33	25	1	0.212	0.211	-117.202	(based model)
				2	0.212
				3	0.208
1	Ras -> PI3K	33	27	1	0.2	0.203	-114.496	0.137931
				2	0.206
				3	0.204
2	MEK1,2 -| Grb2SOS	33	27	1	0.21	0.204	-114.496	0.120098
				2	0.202
				3	0.2
3	PI3K -> Ras	33	27	1	0.165	0.165	-121.247	0.975758
				2	0.167
				3	0.163
4	PI3K -> MEK1,2	33	27	1	0.168	0.164	-121.45	1.00305
				2	0.162
				3	0.162
5	PIP3 -> GabSOS	33	27	1	0.2	0.205	-114.496	0.102439
				2	0.208
				3	0.206
6	Akt -| GabSOS	33	27	1	0.21	0.207	-114.995	0.0676329
				2	0.197
				3	0.214
7	Akt -| Raf	33	27	1	0.21	0.205	-114.168	0.102439
				2	0.202
				3	0.204
8	PLCγ -> PI3K	33	27	1	0.204	0.202	-114.995	0.155941
				2	0.207
				3	0.197
9	PKC -> MEK1,2	33	27	1	0.201	0.205	-114.332	0.102439
				2	0.209
				3	0.206
				**The critical value of the F-distribution for a desired false-rejection probability (alpha) at 0.05 is 4.737
