# Supplementary material for: A Probabilistic Boolean Network Approach for the Analysis of Cancer-Specific Signalling: A Case Study of Deregulated PDGF Signalling in GIST
Source: PLoS One. 2016 May 27;11(5):e0156223. doi: 10.1371/journal.pone.0156223 (PMC4883749; doi:10.1371/journal.pone.0156223)
Supplement: S4 File — This spreadsheet provides the fitting costs of the model variants with pairs of combined crosstalk interactions comparing to the ones with single crosstalk interaction (in diagonal) and without crosstalk interaction. Only the model variants that include crosstalk number 3 (from PI3K to Ras) or number 4 (from PI3K to MEK1,2) have better fitting cost. (XLSX) [file pone.0156223.s008.xlsx]

## Sheet: Sheet1
Results from pair-wise crosstalk combination study
No CT	0.208
Crosstalk	Nr 1	Nr 2	Nr 3	Nr 4	Nr 5	Nr 6	Nr 7	Nr 8	Nr 9
Nr 1	0.2	0.204	0.166	0.17	0.206	0.205	0.206	0.204	0.198
Nr 2		0.2	0.163	0.164	0.202	0.204	0.205	0.203	0.207
Nr 3			0.163	0.172	0.168	0.172	0.176	0.165	0.175
Nr 4				0.162	0.162	0.17	0.167	0.162	0.165
Nr 5					0.2	0.205	0.195	0.198	0.199
Nr 6						0.197	0.209	0.191	0.208
Nr 7							0.202	0.209	0.213
Nr 8								0.197	0.2
Nr 9									0.201
Color code:		< 1.160		0.160 to 0.179		0.180 to 0.209		> 0.209
