# Supplementary material for: A Probabilistic Boolean Network Approach for the Analysis of Cancer-Specific Signalling: A Case Study of Deregulated PDGF Signalling in GIST
Source: PLoS One. 2016 May 27;11(5):e0156223. doi: 10.1371/journal.pone.0156223 (PMC4883749; doi:10.1371/journal.pone.0156223)
Supplement: S5 File — This spreadsheet provides a list of Boolean interactions in the final PBN model together with the mean and standard deviation of the optimised selection probabilities, i.e. weights of interaction, generated from the best 500 parameter sets of the optimisation. Very low overall standard deviations of the optimised weights (mean = 0.03) indicate the high consistency of the optimisation result. (XLS) [file pone.0156223.s009.xls]

## Sheet: Sheet1
Rules	Mean	S.D.
DOX = 1	1	0
SHP2 = PDGFR	0.453254	0.0562261
SHP2 = 0 (dMAPK)	0.546746	0.0562261
MEK12 = MEK12_induce	0.148826	0.0309079
MEK12 = 0 (U0126)	0.851174	0.0309079
PI3K_PDGFR = PDGFR	0.324942	0.041303
PI3K_PDGFR = 0 (dPI3K)	0.675058	0.041303
prePI3K = PI3K_PDGFR	1	0
PI3K = prePI3K	0.107159	0.0558261
PI3K = 0 (Wortmannin)	0.892841	0.0558261
PLCg = PDGFR	0.605223	0.0501461
PLCg = 0 (dMAPK)	0.394777	0.0501461
PKC = PKC_induce	0.847701	0.0708093
PKC = 0 (Wortmannin)	0.152299	0.0708093
bPDK = 1	1	0
bPTEN = 1	1	0
bPKC = 1	1	0
PDGFR = DOX	0.722041	0.0520355
PDGFR = DOX & ~cCbl	0.0428868	0.00652203
PDGFR = DOX & ~PPX	0.172109	0.0564956
PDGFR = DOX & ~SHP2	0.0629631	0.0116149
PPX = ~PDGFR	1	0
cCbl = PDGFR	1	0
Grb2SOS = SHP2	1	0
GabSOS = SHP2	1	0
Ras = Grb2SOS | GabSOS	1	0
Raf1 = Ras	1	0
MEK12_induce = Raf1	0.774271	0.0330624
MEK12_induce = PI3K	0.225729	0.0330624
ERK12 = MEK12	1	0
PIP3 = PI3K	0.954829	0.0336341
PIP3 = PI3K & ~bPTEN	0.0451711	0.0336341
PDK = PIP3	0.924505	0.0512202
PDK = bPDK	0.0754948	0.0512202
AKT = PIP3	0.441856	0.0910783
AKT = PDK	0.191756	0.122311
AKT = MTOR	0.366388	0.0713801
MTOR = AKT	1	0
IP3_CaIon_DAG = PLCg	1	0
PKC_induce = IP3_CaIon_DAG	0.00325836	0.00554188
PKC_induce = bPKC	0.996742	0.00554188
STAT5 = PDGFR	1	0
